# Supplementary material
Source: ML conference proceedings conference paper supplement (https://proceedings.neurips.cc/paper_files/paper/2009/hash/01882513d5fa7c329e940dda99b12147-Abstract.html)
Supplement: Supplementary file 1 [file 01882513d5fa7c329e940dda99b12147-Supplemental.zip]

---

# Compressed Least-Squares Regression (Supplementary material)

---

**Odalric-Ambrym Maillard and Rémi Munos**  
 SequeL Project, INRIA Lille - Nord Europe, France  
 {odalric.maillard, remi.munos}@inria.fr

## 1 Proof of Proposition 1

**Proposition 1** *Let  $(u_k)_{1 \leq k \leq K}$  and  $v$  be vectors of  $\mathbb{R}^N$ . Let  $A$  be a  $M \times N$  matrix of i.i.d. elements drawn from one of the previously defined distributions. For any  $\varepsilon > 0$ ,  $\delta > 0$ , for  $M \geq \frac{1}{\frac{\varepsilon^2}{4} - \frac{\varepsilon^3}{6}} \log \frac{4K}{\delta}$ , we have, with probability at least  $1 - \delta$ , for all  $k \leq K$ ,*

$$|Au_k \cdot Av - u_k \cdot v| \leq \varepsilon \|u_k\| \|v\|.$$

*Proof:* We make use of the following lemma, which states that the random (with respect to the choice of the matrix  $A$ ) variable  $\|Au\|^2$  concentrates around its expectation  $\|u\|^2$  when  $M$  is large. The proof uses concentration inequalities (Cramer's large deviation Theorem) and may be found e.g. in [1].

**Lemma 1** *For any vector  $u$  in  $\mathbb{R}^N$  and any  $\varepsilon \in (0, 1)$ , we have*

$$\begin{aligned} \mathbb{P}\left(\|Au\|^2 \geq (1 + \varepsilon)\|u\|^2\right) &\leq e^{-M(\varepsilon^2/4 - \varepsilon^3/6)} \\ \mathbb{P}\left(\|Au\|^2 \leq (1 - \varepsilon)\|u\|^2\right) &\leq e^{-M(\varepsilon^2/4 - \varepsilon^3/6)} \end{aligned}$$

To prove the proposition, we apply the lemma to any couple of vectors  $u + w$  and  $u - w$ , where  $u$  and  $w$  are vectors of norm 1. From the parallelogram law, we have that

$$\begin{aligned} 4Au \cdot Aw &= \|Au + Aw\|^2 - \|Au - Aw\|^2 \\ &\leq (1 + \varepsilon)\|u + w\|^2 - (1 - \varepsilon)\|u - w\|^2 \\ &= 4u \cdot w + \varepsilon(\|u + w\|^2 + \|u - w\|^2) \\ &= 4u \cdot w + 2\varepsilon(\|u\|^2 + \|w\|^2) = 4u \cdot w + 4\varepsilon. \end{aligned}$$

fails with probability  $2e^{-M(\varepsilon^2/4 - \varepsilon^3/6)}$  (we applied the previous lemma twice at line 2).

Thus for each  $k \leq K$ , we have with same probability:

$$Au_k \cdot Av \leq u_k \cdot v + \varepsilon \|u_k\| \|v\|.$$

Now the symmetric inequality holds with the same probability, and using a union bound for considering all  $(u_k)_{k \leq K}$ , we have that

$$|Au_k \cdot Av - u_k \cdot v| \leq \varepsilon \|u_k\| \|v\|,$$

holds for all  $k \leq K$ , with probability  $1 - 4Ke^{-M(\varepsilon^2/4 - \varepsilon^3/6)}$ , and the proposition follows.  $\square$

## 2 Proof of Proposition 2

**Proposition 2** Assume that  $f^*$  is  $(L, \gamma)$ -Lipschitz (i.e. for all  $v \in \mathcal{X}$  there exists a polynomial  $p_v$  of degree  $\lfloor \gamma \rfloor$  such that for all  $u \in \mathcal{X}$ ,  $|f(u) - p_v(u)| \leq L|u - v|^\gamma$ ) with  $1/2 < \gamma \leq p$ . Then setting  $c_h = 2^{h(1-2\gamma)/4}$ , we have  $\|\alpha^+\| \sup_x \|\varphi(x)\| \leq L \frac{2^\gamma}{1-2^{1/2-\gamma}} \int_0^1 |\varphi_0|$ , which is independent of  $N$ .

*Proof:*  $f^+$  decomposes as  $f^+ = \sum_{1 \leq h \leq H} \sum_l \alpha_{h,l}^0 \varphi_{h,l}^0 = \sum_{1 \leq h \leq H} \sum_l (\alpha_{h,l}^0 2^{h/2} c_h^{-1}) \varphi_{h,l}$ . By Theorem 6.3 of [2], since  $f^*$  is  $(L, \gamma)$ -Lipschitz and  $\varphi^0$  has at least  $p \geq \gamma$  vanishing moments, we have  $|\alpha_{h,l}^0| \leq L 2^\gamma \int_0^1 |\varphi_0| 2^{-h(\gamma+1/2)}$ . Thus we deduce:

$$\|\alpha^+\|^2 = \sum_{1 \leq h \leq H} \sum_l \alpha_{h,l}^2 \leq (L 2^\gamma \int_0^1 |\varphi_0|)^2 \sum_{1 \leq h \leq H} 2^h 2^{-2h\gamma} c_h^{-2}$$

and

$$\|\varphi(x)\|^2 = \sum_{1 \leq h \leq H} \sum_l c_h^2 2^{-h} (\varphi_{h,l}^0(x))^2 \leq \sum_{1 \leq h \leq H} c_h^2$$

Thus, setting  $c_h = 2^{(1-2\gamma)h/4}$ , we deduce

$$\|\alpha^+\|^2 \sup_x \|\varphi(x)\|^2 \leq (L 2^\gamma \int_0^1 |\varphi_0|)^2 (1 - 2^{1/2-\gamma})^{-2}$$

since  $\gamma > 1/2$ . □

## References

- [1] Dimitris Achlioptas. Database-friendly random projections: Johnson-Lindenstrauss with binary coins. *Journal of Computer and System Sciences*, 66(4):671–687, June 2003.
- [2] Stephane Mallat. *A Wavelet Tour of Signal Processing*. Academic Press, 1999.
