# Supplementary material
Source: ML conference proceedings conference paper supplement (https://proceedings.neurips.cc/paper_files/paper/2009/hash/01882513d5fa7c329e940dda99b12147-Abstract.html)
Supplement: Supplementary file 2 [file 01882513d5fa7c329e940dda99b12147-Supplemental.zip]

Archive with 1 entries (1 files):
- extra/NIPS2009_0899_extra.pdf
